# Supplementary material for: Determination of the protonation preferences of bilin pigments in cryptophyte antenna complexes
Source: Royal Society of Chemistry journal article supplement (doi:10.1039/c8cp02541j), 2018-01-01
Supplement: c8cp02541j1.pdf [file c8cp02541j1.pdf]

**Supporting Information for**  
**Determination of the protonation preferences of bilin pigments in**  
**cryptophyte antenna complexes**

Marina Corbella,<sup>1</sup> Zi S. D. Toa,<sup>2</sup> Gregory D. Scholes,<sup>2</sup> F. Javier Luque<sup>3</sup> and Carles Curutchet<sup>1</sup>

<sup>1</sup>Departament de Farmàcia i Tecnologia Farmacèutica i Fisicoquímica and Institut de Química Teòrica i Computacional (IQTUB), Facultat de Farmàcia i Ciències de l'Alimentació, Universitat de Barcelona, Barcelona Spain

<sup>2</sup>Department of Chemistry, Princeton University, Washington Road, Princeton, New Jersey 08544, United States

<sup>3</sup>Departament de Nutrició, Ciències de l'Alimentació i Gastronomia, Institut de Biomedicina (IBUB) and Institut de Química Teòrica i Computacional (IQTUB), Facultat de Farmàcia i Ciències de l'Alimentació, Universitat de Barcelona, Santa Coloma de Gramenet, Spain.

**Table S1.** Electronic energies, free energy corrections and solvation free energies computed for pyridine, imidazole and their conjugated acids.

| X               | $E_{SCS-MP2/CBS}^a$ | $\Delta E_{CCSD}^a$ | $G_{corr}^a$ | $\Delta G_{SOLMST}^b$ | $\Delta G_{SOLMST}^b$ |
|-----------------|---------------------|---------------------|--------------|-----------------------|-----------------------|
| Pyridine        |                     |                     |              |                       |                       |
| X               | -247.8279           | -0.0568             | 0.0596       | -4.3                  | -4.6                  |
| XH <sup>+</sup> | -248.1942           | -0.0579             | 0.0733       | -58.0                 | -58.4                 |
| Imidazole       |                     |                     |              |                       |                       |
| X               | -225.8370           | -0.0461             | 0.0433       | -10.0                 | -8.5                  |
| XH <sup>+</sup> | -226.2080           | -0.0482             | 0.0571       | -64.9                 | -62.1                 |

<sup>a</sup>Energies in hartree. <sup>b</sup>Solvation energies in kcal/mol.

**Table S2.** Electronic energies, free energy corrections and solvation free energies computed for deprotonated bilins on different pyrrole rings (A-D) as well as the fully protonated form (H<sup>+</sup>).

| Ring           | $E_{SCS-MP2/CBS}^a$ | $\Delta E_{CCSD}^a$ | $G_{corr}^a$ | $\Delta G_{sol.MST}^b$ | $\Delta G_{sol.SMD}^b$ |
|----------------|---------------------|---------------------|--------------|------------------------|------------------------|
| PEB            |                     |                     |              |                        |                        |
| A              | -1532.7499          | -0.3571             | 0.5389       | -17.1                  | -20.9                  |
| B              | -1532.7769          | -0.3533             | 0.5397       | -12.0                  | -15.6                  |
| C              | -1532.7802          | -0.3535             | 0.5413       | -11.7                  | -14.2                  |
| D              | -1532.6879          | -0.3540             | 0.5391       | -34.1                  | -40.3                  |
| H <sup>+</sup> | -1533.1724          | -0.3557             | 0.5525       | -49.8                  | -53.8                  |
| PEB'           |                     |                     |              |                        |                        |
| A              | -1572.7225          | -0.3737             | 0.6034       | -16.8                  | -20.5                  |
| B              | -1572.7477          | -0.3700             | 0.6037       | -10.7                  | -14.9                  |
| C              | -1572.7507          | -0.3702             | 0.6046       | -10.5                  | -13.5                  |
| D              | -1572.6558          | -0.3710             | 0.6040       | -34.4                  | -40.0                  |
| H <sup>+</sup> | -1573.1437          | -0.3726             | 0.6179       | -49.1                  | -53.7                  |
| DBV            |                     |                     |              |                        |                        |
| A              | -1531.5222          | -0.3505             | 0.5150       | -18.0                  | -21.9                  |
| B              | -1531.5608          | -0.3456             | 0.5152       | -11.8                  | -15.2                  |
| C              | -1531.5641          | -0.3462             | 0.5171       | -11.6                  | -14.2                  |
| D              | -1531.4713          | -0.3469             | 0.5132       | -33.0                  | -39.1                  |
| H <sup>+</sup> | -1531.9536          | -0.3484             | 0.5274       | -50.4                  | -54.4                  |
| DBV'           |                     |                     |              |                        |                        |
| A              | -1571.9913          | -0.3672             | 0.5791       | -17.0                  | -22.0                  |
| B              | -1572.0302          | -0.3624             | 0.5791       | -10.8                  | -15.2                  |
| C              | -1572.0335          | -0.3630             | 0.5799       | -10.5                  | -14.0                  |
| D              | -1571.9406          | -0.3636             | 0.5798       | -30.9                  | -38.4                  |
| H <sup>+</sup> | -1572.4240          | -0.3653             | 0.5920       | -49.2                  | -54.0                  |
| PCB            |                     |                     |              |                        |                        |
| A              | -1532.7702          | -0.3533             | 0.5395       | -16.4                  | -19.1                  |
| B              | -1532.7942          | -0.3497             | 0.5412       | -10.9                  | -14.0                  |
| C              | -1532.7940          | -0.3494             | 0.5412       | -10.8                  | -13.9                  |
| D              | -1532.7569          | -0.3541             | 0.5396       | -17.4                  | -19.9                  |
| H <sup>+</sup> | -1533.1937          | -0.3525             | 0.5535       | -45.7                  | -49.8                  |
| MBV            |                     |                     |              |                        |                        |
| A              | -1531.5408          | -0.3463             | 0.5155       | -16.5                  | -19.5                  |
| B              | -1531.5777          | -0.3417             | 0.5163       | -10.4                  | -13.5                  |
| C              | -1531.5776          | -0.3417             | 0.5158       | -10.3                  | -13.5                  |
| D              | -1531.5394          | -0.3463             | 0.5137       | -17.3                  | -20.0                  |
| H <sup>+</sup> | -1531.9740          | -0.3449             | 0.5285       | -46.6                  | -50.1                  |

<sup>a</sup>Energies in hartree. <sup>b</sup>Solvation energies in kcal/mol.

**Table S3.** Acid dissociation constants computed using PROPKA for bilin pyrrole rings B and C in their specific protein environments based on the crystal structure.

|                                      | $pK_a(B)$             | $pK_a(C)$ |     |
|--------------------------------------|-----------------------|-----------|-----|
| PE545 ( $\alpha,\beta\alpha,\beta$ ) | DBV <sub>19A</sub>    | 5.6       | 5.1 |
|                                      | DBV <sub>19B</sub>    | 5.5       | 5.0 |
|                                      | PEB <sub>50/61C</sub> | 8.1       | 6.8 |
|                                      | PEB <sub>158C</sub>   | 7.4       | 6.9 |
|                                      | PEB <sub>82C</sub>    | 6.8       | 6.5 |
|                                      | PEB <sub>50/61D</sub> | 7.6       | 7.2 |
|                                      | PEB <sub>158D</sub>   | 5.7       | 5.2 |
|                                      | PEB <sub>82D</sub>    | 6.9       | 6.6 |
| PC577 ( $\alpha\beta\alpha\beta$ )   | PCB <sub>20A</sub>    | 7.9       | 7.8 |
|                                      | DBV <sub>50/61B</sub> | 7.6       | 6.7 |
|                                      | PCB <sub>158B</sub>   | 7.9       | 8.1 |
|                                      | PCB <sub>82B</sub>    | 7.1       | 7.4 |
|                                      | PCB <sub>20C</sub>    | 7.9       | 7.8 |
|                                      | DBV <sub>50/61D</sub> | 7.7       | 6.7 |
|                                      | PCB <sub>158D</sub>   | 7.8       | 8.1 |
|                                      | PCB <sub>82D</sub>    | 7.1       | 7.3 |
| PC612 ( $\alpha\beta\alpha\beta$ )   | PCB <sub>20A</sub>    | 8.0       | 8.0 |
|                                      | DBV <sub>50/61B</sub> | 7.5       | 6.5 |
|                                      | PCB <sub>158B</sub>   | 7.8       | 8.1 |
|                                      | PCB <sub>82B</sub>    | 7.0       | 7.4 |
|                                      | PCB <sub>20C</sub>    | 8.0       | 8.1 |
|                                      | DBV <sub>50/61D</sub> | 7.7       | 6.6 |
|                                      | PCB <sub>158D</sub>   | 7.9       | 8.2 |
|                                      | PCB <sub>82D</sub>    | 7.2       | 7.4 |
| PC630 ( $\alpha,\beta\alpha,\beta$ ) | MBV <sub>19A</sub>    | 5.7       | 4.9 |
|                                      | DBV <sub>50/61B</sub> | 7.3       | 6.7 |
|                                      | PCB <sub>158B</sub>   | 7.8       | 7.9 |
|                                      | PCB <sub>82B</sub>    | 7.1       | 7.3 |
|                                      | MBV <sub>19C</sub>    | 5.1       | 4.7 |
|                                      | DBV <sub>50/61D</sub> | 7.1       | 6.4 |
|                                      | PCB <sub>158D</sub>   | 7.7       | 8.1 |
|                                      | PCB <sub>82D</sub>    | 7.0       | 7.3 |
| PC645 ( $\alpha,\beta\alpha,\beta$ ) | MBV <sub>19A</sub>    | 5.9       | 5.2 |
|                                      | DBV <sub>50/61B</sub> | 7.3       | 6.7 |
|                                      | PCB <sub>158B</sub>   | 7.8       | 8.1 |
|                                      | PCB <sub>82B</sub>    | 7.2       | 7.4 |
|                                      | MBV <sub>19C</sub>    | 5.2       | 4.7 |
|                                      | DBV <sub>50/61D</sub> | 6.9       | 6.1 |
|                                      | PCB <sub>158D</sub>   | 7.7       | 8.2 |
|                                      | PCB <sub>82D</sub>    | 6.9       | 7.4 |

**Table S4.** MD-averaged acid dissociation constants computed using PROPKA for the propionic groups linked to pyrrole rings B and C of the bilins in their specific protein environments.

|                                      | $pK_a(B)^a$           | $pK_a(C)^a$ |     |
|--------------------------------------|-----------------------|-------------|-----|
| PE545 ( $\alpha,\beta\alpha,\beta$ ) | DBV <sub>19A</sub>    | 3.7         | 5.0 |
|                                      | DBV <sub>19B</sub>    | 3.6         | 4.3 |
|                                      | PEB <sub>50/61C</sub> | 4.9         | 4.6 |
|                                      | PEB <sub>158C</sub>   | 4.3         | 2.7 |
|                                      | PEB <sub>82C</sub>    | 2.7         | 3.6 |
|                                      | PEB <sub>50/61D</sub> | 4.8         | 4.2 |
|                                      | PEB <sub>158D</sub>   | 4.5         | 4.1 |
|                                      | PEB <sub>82D</sub>    | 3.5         | 3.4 |
| PC577 ( $\alpha\beta\alpha\beta$ )   | PCB <sub>20A</sub>    | 3.0         | 2.7 |
|                                      | DBV <sub>50/61B</sub> | 3.7         | 4.3 |
|                                      | PCB <sub>158B</sub>   | 4.3         | 3.7 |
|                                      | PCB <sub>82B</sub>    | 3.8         | 3.2 |
|                                      | PCB <sub>20C</sub>    | 3.5         | 2.7 |
|                                      | DBV <sub>50/61D</sub> | 3.6         | 4.0 |
|                                      | PCB <sub>158D</sub>   | 4.3         | 3.8 |
|                                      | PCB <sub>82D</sub>    | 3.8         | 3.4 |
| PC612 ( $\alpha\beta\alpha\beta$ )   | PCB <sub>20A</sub>    | 4.8         | 2.5 |
|                                      | DBV <sub>50/61B</sub> | 4.2         | 4.5 |
|                                      | PCB <sub>158B</sub>   | 4.4         | 4.1 |
|                                      | PCB <sub>82B</sub>    | 3.4         | 3.5 |
|                                      | PCB <sub>20C</sub>    | 4.9         | 2.8 |
|                                      | DBV <sub>50/61D</sub> | 4.3         | 4.6 |
|                                      | PCB <sub>158D</sub>   | 4.4         | 3.8 |
|                                      | PCB <sub>82D</sub>    | 3.6         | 3.5 |
| PC630 ( $\alpha,\beta\alpha,\beta$ ) | MBV <sub>19A</sub>    | 3.6         | 2.7 |
|                                      | DBV <sub>50/61B</sub> | 4.5         | 4.6 |
|                                      | PCB <sub>158B</sub>   | 4.4         | 3.6 |
|                                      | PCB <sub>82B</sub>    | 3.7         | 3.3 |
|                                      | MBV <sub>19C</sub>    | 3.8         | 3.0 |
|                                      | DBV <sub>50/61D</sub> | 4.0         | 4.4 |
|                                      | PCB <sub>158D</sub>   | 4.3         | 3.6 |
|                                      | PCB <sub>82D</sub>    | 2.9         | 3.4 |
| PC645 ( $\alpha,\beta\alpha,\beta$ ) | MBV <sub>19A</sub>    | 4.7         | 3.0 |
|                                      | DBV <sub>50/61B</sub> | 4.7         | 4.7 |
|                                      | PCB <sub>158B</sub>   | 4.3         | 3.9 |
|                                      | PCB <sub>82B</sub>    | 3.9         | 3.4 |
|                                      | MBV <sub>19C</sub>    | 3.9         | 2.9 |
|                                      | DBV <sub>50/61D</sub> | 4.7         | 4.3 |
|                                      | PCB <sub>158D</sub>   | 4.4         | 3.7 |
|                                      | PCB <sub>82D</sub>    | 3.7         | 3.2 |

<sup>a</sup>Values are averaged over PROPKA calculations where the central pyrrole ring is assumed to deprotonate either on ring B or C, which present minor differences below 0.2  $pK_a$  units in all cases.

**Table S5.** MD-averaged acid dissociation constants computed using PROPKA for residues interacting with bilin central pyrrole rings in their specific protein environments.

|                                    |                       | $pK_a(B)^a$         | $pK_a(C)^b$ |     |
|------------------------------------|-----------------------|---------------------|-------------|-----|
| PE545 ( $\alpha\beta\alpha\beta$ ) |                       |                     |             |     |
|                                    | DBV <sub>19A</sub>    | His16A <sup>c</sup> | 4.6         | 4.5 |
|                                    | DBV <sub>19B</sub>    | His16B <sup>c</sup> | 3.8         | 3.7 |
|                                    | PEB <sub>50/61C</sub> | Asp54C              | 4.6         | 4.8 |
|                                    | PEB <sub>158C</sub>   | Asp39C              | 5.1         | 5.0 |
|                                    | PEB <sub>82C</sub>    | Asp85C              | 5.0         | 5.1 |
|                                    | PEB <sub>50/61D</sub> | Asp54D              | 3.8         | 3.9 |
|                                    | PEB <sub>158D</sub>   | Asp39D              | 6.9         | 6.8 |
|                                    | PEB <sub>82D</sub>    | Asp85D              | 5.1         | 5.2 |
| PC577 ( $\alpha\beta\alpha\beta$ ) |                       |                     |             |     |
|                                    | PCB <sub>20A</sub>    | Glu16A              | 4.3         | 4.3 |
|                                    | DBV <sub>50/61B</sub> | Asp54B              | 4.6         | 4.6 |
|                                    | PCB <sub>158B</sub>   | Asp39B              | 5.3         | 5.2 |
|                                    | PCB <sub>82B</sub>    | Asp85B              | 4.9         | 5.0 |
|                                    | PCB <sub>20C</sub>    | Glu16C              | 4.6         | 4.5 |
|                                    | DBV <sub>50/61D</sub> | Asp54D              | 4.7         | 4.7 |
|                                    | PCB <sub>158D</sub>   | Asp39D              | 5.3         | 5.3 |
|                                    | PCB <sub>82D</sub>    | Asp85D              | 4.8         | 5.0 |
| PC612 ( $\alpha\beta\alpha\beta$ ) |                       |                     |             |     |
|                                    | PCB <sub>20A</sub>    | Glu16A              | 4.0         | 4.0 |
|                                    | DBV <sub>50/61B</sub> | Asp54B              | 4.8         | 4.8 |
|                                    | PCB <sub>158B</sub>   | Asp39B              | 5.3         | 5.2 |
|                                    | PCB <sub>82B</sub>    | Asp85B              | 4.9         | 5.0 |
|                                    | PCB <sub>20C</sub>    | Glu16C              | 4.6         | 4.6 |
|                                    | DBV <sub>50/61D</sub> | Asp54D              | 4.8         | 4.9 |
|                                    | PCB <sub>158D</sub>   | Asp39D              | 5.6         | 5.5 |
|                                    | PCB <sub>82D</sub>    | Asp85D              | 4.9         | 5.0 |
| PC630 ( $\alpha\beta\alpha\beta$ ) |                       |                     |             |     |
|                                    | MBV <sub>19A</sub>    | -                   | -           | -   |
|                                    | DBV <sub>50/61B</sub> | Asp54B              | 4.6         | 5.0 |
|                                    | PCB <sub>158B</sub>   | Asp39B              | 6.8         | 6.7 |
|                                    | PCB <sub>82B</sub>    | Asp85B              | 4.8         | 4.9 |
|                                    | MBV <sub>19C</sub>    | His22A <sup>d</sup> | 7.4         | 7.4 |
|                                    | DBV <sub>50/61D</sub> | Asp54D              | 3.3         | 3.7 |
|                                    | PCB <sub>158D</sub>   | Asp39D              | 4.6         | 4.5 |
|                                    | PCB <sub>82D</sub>    | Asp85D              | 4.9         | 5.0 |
| PC645 ( $\alpha\beta\alpha\beta$ ) |                       |                     |             |     |
|                                    | MBV <sub>19A</sub>    | -                   | -           | -   |
|                                    | DBV <sub>50/61B</sub> | Asp54B              | 4.8         | 5.3 |
|                                    | PCB <sub>158B</sub>   | Asp39B              | 5.6         | 5.5 |
|                                    | PCB <sub>82B</sub>    | Asp85B              | 4.8         | 5.0 |
|                                    | MBV <sub>19C</sub>    | His21A <sup>d</sup> | 7.6         | 7.6 |
|                                    | DBV <sub>50/61D</sub> | Asp54D              | 4.0         | 4.3 |
|                                    | PCB <sub>158D</sub>   | Asp39D              | 4.4         | 4.3 |
|                                    | PCB <sub>82D</sub>    | Asp85D              | 4.9         | 5.0 |

<sup>a</sup>Values computed assuming deprotonation on bilin pyrrole ring B. <sup>b</sup>Values computed assuming deprotonation on bilin pyrrole ring C. <sup>c</sup>Histidines in PE545 interacting with DBV central pyrrole rings through a water molecule as shown in Fig. S1a. <sup>d</sup>Histidines in PC630 and PC645 interacting with a propionic group of MBV in chain C and Glu26A/Glu25A, respectively, as represented in Fig. S1b.

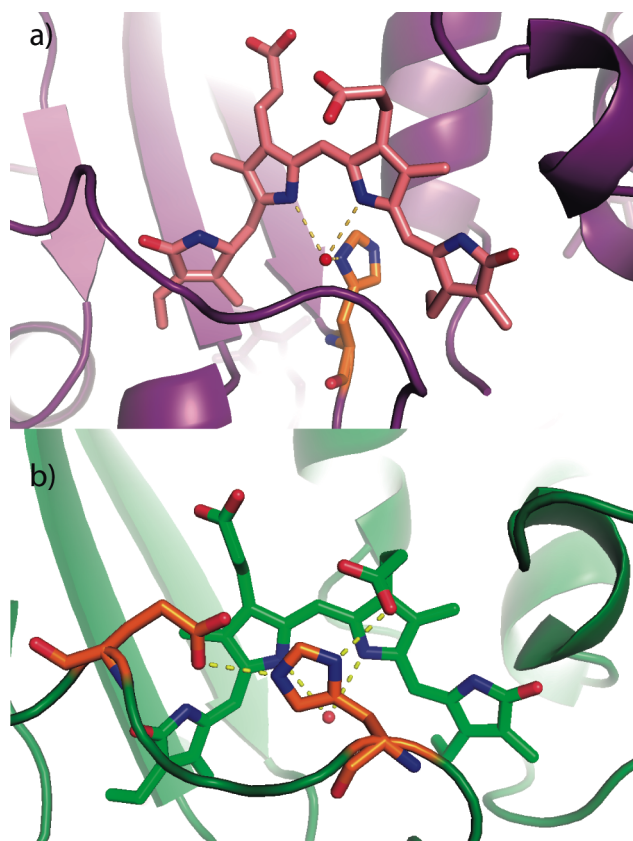

**Figure S1.** Representation of the environment surrounding bilin pigments. a) DBV<sub>19A</sub> pigment in the PE545 complex with central pyrrole rings interacting with His16A through a water molecule. b) MBV<sub>19C</sub> pigment in the PC645 complex with a propionic group and Glu25A interacting with His21A and central pyrrole rings interacting with a crystallographic water.

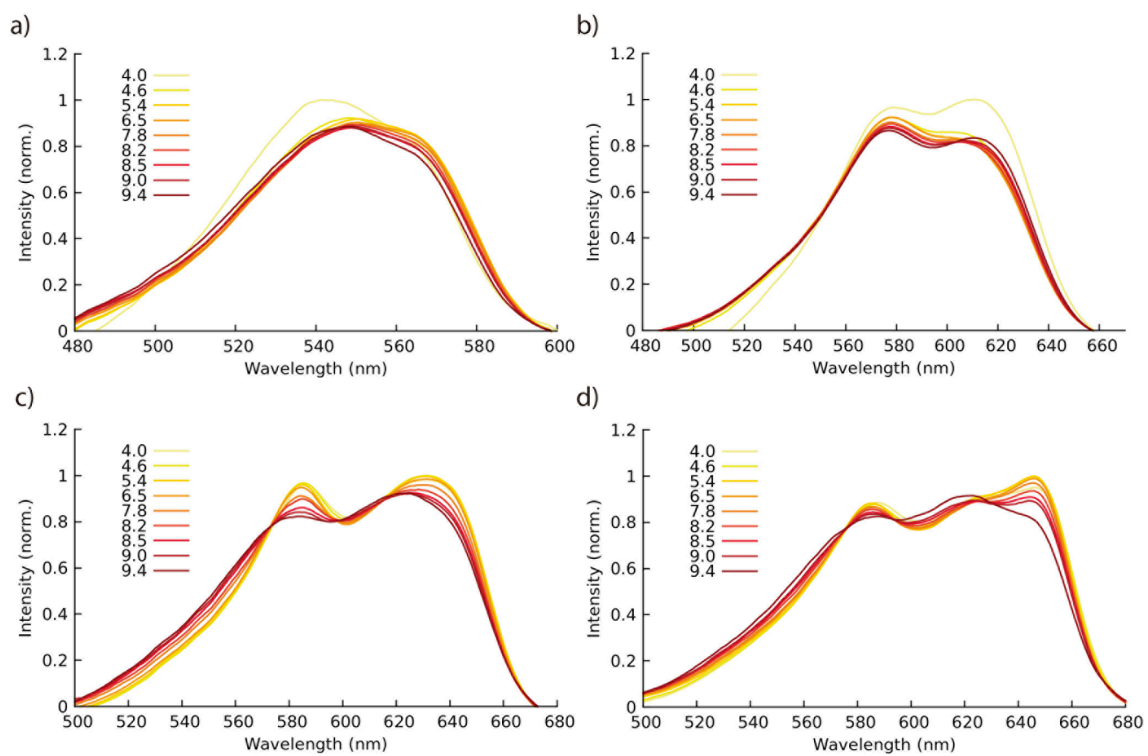

**Figure S2.** Normalized absorption spectra of cryptophyte antenna complexes at different *pH* values. a) PE545, b) PC577, c) PC630 and d) PC645.
